# Supplementary material for: Development and External Validation of 18F-FDG PET-Based Radiomic Model for Predicting Pathologic Complete Response after Neoadjuvant Chemotherapy in Breast Cancer
Source: MDPI journal article supplement (doi:10.3390/cancers15153842), 2023-07-28
Supplement: s1 [file s1]

**Table S1.** List of 72 Quantitative PET-Based Radiomic Features.

| Parent matrix                              | Radiomic features                                                                                                                                                                                                                                                                                                |
|--------------------------------------------|------------------------------------------------------------------------------------------------------------------------------------------------------------------------------------------------------------------------------------------------------------------------------------------------------------------|
| Co-occurrence                              | Second angular moment, contrast, entropy, homogeneity, dissimilarity, inverse difference moment                                                                                                                                                                                                                  |
| Voxel-alignment                            | Short-run emphasis, long-run emphasis, intensity variability, run-length variability, run percentage, low-intensity run emphasis, high-intensity run emphasis, low-intensity short-run emphasis, high-intensity short-run emphasis, low-intensity long-run emphasis, high-intensity long-run emphasis            |
| Neighborhood intensity difference          | Coarseness, contrast, busyness, complexity, strength                                                                                                                                                                                                                                                             |
| Intensity size-zone                        | Short-zone emphasis, large-zone emphasis, intensity variability, size-zone variability, zone percentage, low-intensity zone emphasis, high-intensity zone emphasis, low-intensity short-zone emphasis, high-intensity short-zone emphasis, low-intensity large-zone emphasis, high-intensity large-zone emphasis |
| Normalized co-occurrence                   | Second angular moment, contrast, entropy, homogeneity, inverse difference moment, dissimilarity, cooccurrence correlation                                                                                                                                                                                        |
| Voxel statics                              | Minimum SUV, maximum SUV, mean SUV, SUV variance, SUV SD, SUV skewness, SUV kurtosis, SUV skewness (bias corrected), SUV kurtosis (bias corrected), TLG, tumor volume, entropy, SULpeak                                                                                                                          |
| Texture spectrum                           | Max spectrum, Black-white symmetry                                                                                                                                                                                                                                                                               |
| Texture feature coding                     | Coarseness, homogeneity, mean convergence, variance                                                                                                                                                                                                                                                              |
| Texture feature coding cooccurrence matrix | Second angular moment, contrast, entropy, homogeneity, intensity, inverse difference moment, code entropy, code similarity                                                                                                                                                                                       |
| Neighborhood gray-level dependence         | Small-number emphasis, large-number emphasis, number nonuniformity, second moment, entropy                                                                                                                                                                                                                       |

SUV, standardized uptake value; SD, standard deviation; TLG, total lesion glycolysis.
